# Supplementary material for: A flexible and high-performance electrochromic smart window produced by WO3/Ti3C2Tx MXene hybrids
Source: Royal Society of Chemistry journal article supplement (doi:10.1039/d0tc05547f), 2021-01-01
Supplement: d0tc05547f1.pdf [file d0tc05547f1.pdf]

## Supporting information

# Flexible and High-Performance Electrochromic Smart Window Produced by $\text{WO}_3/\text{Ti}_3\text{C}_2\text{T}_x$ MXene Hybrids

*Van-Tam Nguyen*<sup>a,b,#</sup>, *Bok Ki Min*<sup>a,#</sup>, *Seong K. Kim*<sup>c</sup>, *Yoonsik Yi*<sup>a</sup>, and *Choon-Gi Choi*<sup>a,b,\*</sup>

<sup>a</sup> Graphene Research Team, ICT Creative Research Lab., Electronics and Telecommunications Research Institute (ETRI), 218 Gajeong-ro, Yuseong-gu, Daejeon 34129, Republic of Korea.

<sup>b</sup> School of ETRI (ICT-Advanced Device Technology), University of Science and Technology (UST), Daejeon 34113, Republic of Korea.

<sup>c</sup> Department of Advanced Materials and Chemical Engineering, Hannam University, Daejeon 34430, Republic of Korea.

\* Corresponding author. Tel: +82 42 860 6834. E-mail: cgchoi@etri.re.kr

#V.-T. Nguyen and B. K. Min contributed equally to this work

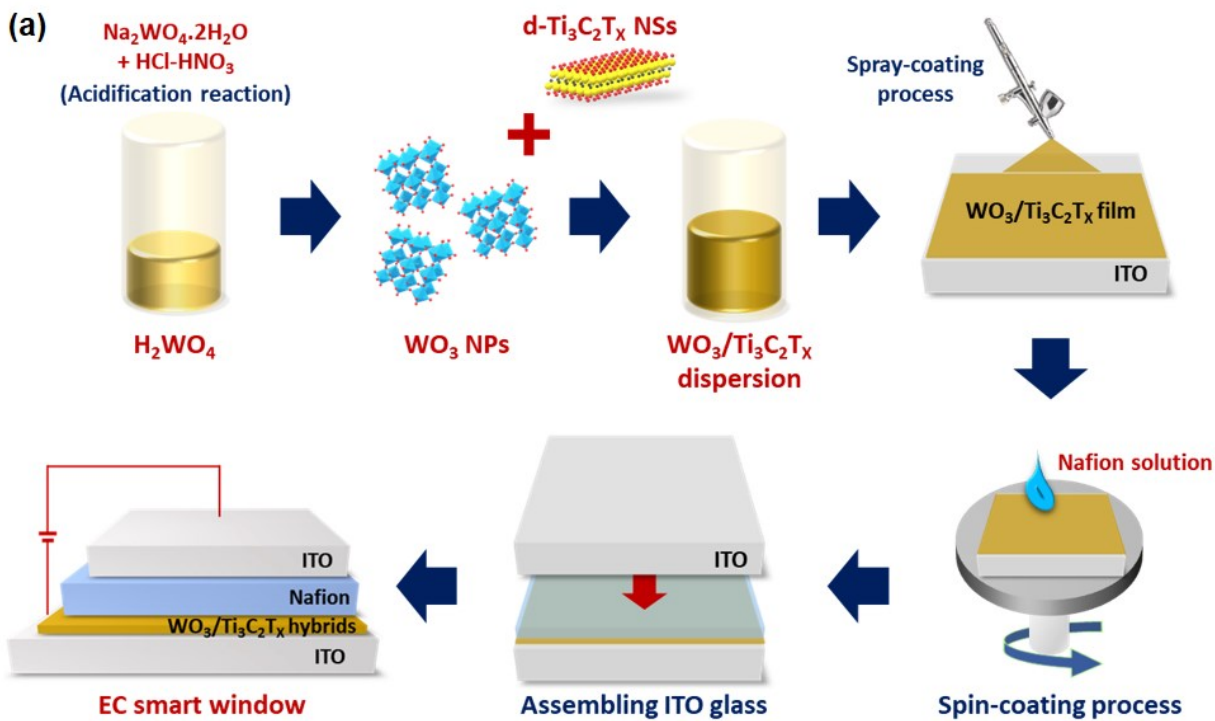

(b)

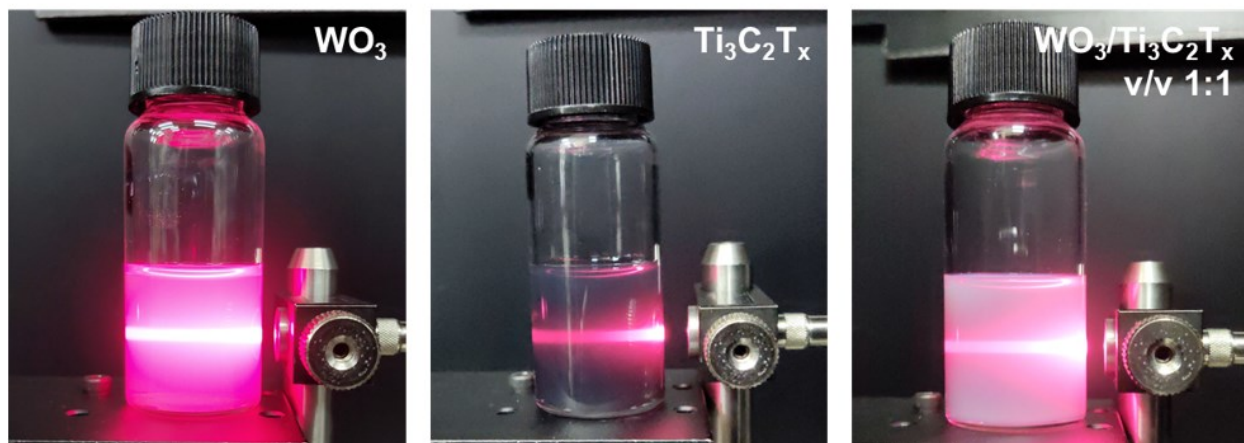

**Fig. S1** (a) Schematic illustration of the fabrication procedure for electrochromic smart windows based on  $\text{WO}_3/\text{Ti}_3\text{C}_2\text{T}_x$  hybrids, (b) Tyndall effect images of  $\text{WO}_3$ ,  $\text{Ti}_3\text{C}_2\text{T}_x$  and  $\text{WO}_3/\text{Ti}_3\text{C}_2\text{T}_x$  v/v 1:1 colloid.

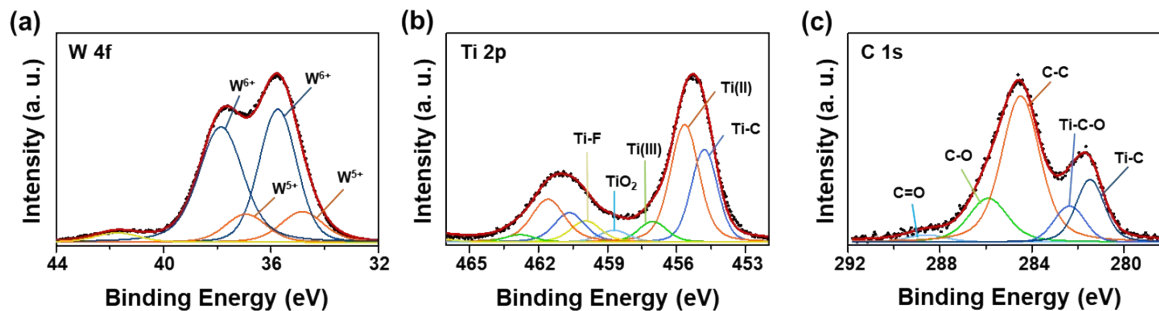

**Fig. S2** XPS spectra of (a) W 4f core level, (b) Ti 2p core level, and (c) C 1s core level for  $\text{WO}_3/\text{Ti}_3\text{C}_2\text{T}_x$  hybrids.

Figure S2 includes the XPS core-level spectra of each element including W 4f, Ti 2p, and C 1s for  $\text{WO}_3/\text{Ti}_3\text{C}_2\text{T}_x$  hybrids. W 4f core-level spectrum shows a double peak at binding energies of 35.69 eV and 37.8 eV, attributed to W 4f<sub>7/2</sub> and W 4f<sub>5/2</sub>, respectively (Figure S2a). These peaks are illustrative a 6+ oxidation state of W in  $\text{WO}_3$ .<sup>1</sup> The small peaks in at binding energy of 34.8 eV, 36.9 eV, and 41.15 eV are ascribed to a 5+ oxidation state of W in  $\text{WO}_3$ . The presence of W<sup>5+</sup> state, corresponding to the cations in the non-stoichiometric  $\text{WO}_x$  along with the shear plane structure, confirms the formation of not only stoichiometric  $\text{WO}_3$  but also non-stoichiometric  $\text{WO}_x$ . Figure S2b shows the Ti 2p core-level for the  $\text{WO}_3/\text{Ti}_3\text{C}_2\text{T}_x$  hybrids. It was deconvoluted into the components corresponding to Ti–C, Ti (II), Ti (III), Ti(IV)– $\text{TiO}_2$ , and Ti–F peak.<sup>2-4</sup> In the Ti 2p<sub>3/2</sub> level, each component was positioned at binding energies of 454.8, 455.7, 457, 458.7, and 459.9 eV, respectively. The presence of Ti(IV)– $\text{TiO}_2$  and Ti–F is attributed by the terminal groups during the removal process of Al from the  $\text{Ti}_3\text{AlC}_2$  MAX phase. From C 1s core level of  $\text{WO}_3/\text{Ti}_3\text{C}_2\text{T}_x$  hybrids (Figure S2c), the spectra have two significant peaks corresponding to Ti–C and C–C bonding that are located at 281.8 and 284.7 eV, respectively.<sup>5,6</sup> Besides, peaks related to C=O, C–OH, and C–O–Ti bonding indicate the presence of functional groups.

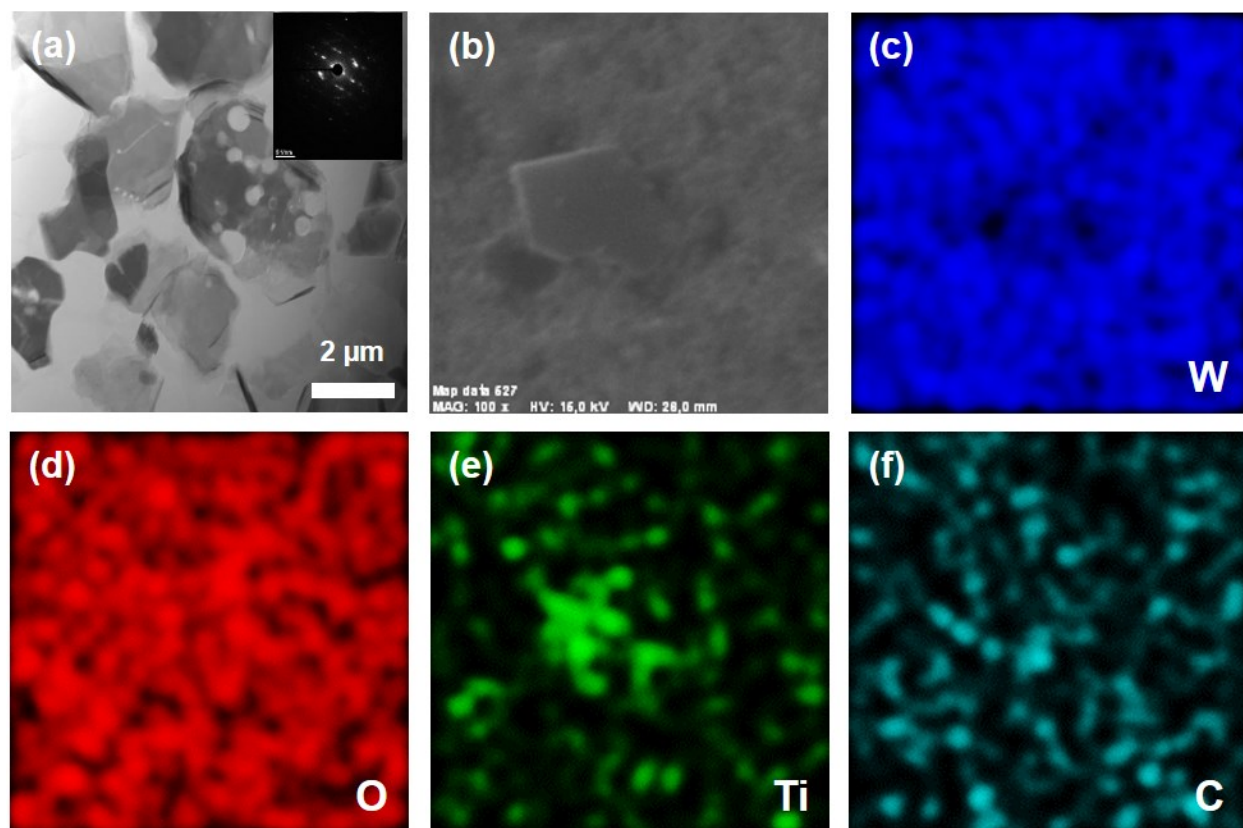

**Fig. S3** (a) TEM image of  $\text{Ti}_3\text{C}_2\text{T}_x$  nanosheets with SEAD pattern given in the inset; EDS mapping of  $\text{WO}_3/\text{Ti}_3\text{C}_2\text{T}_x$  hybrids film with (b) SEM image of mapping area, (c) W element, (d) O element, (e) Ti element, and (f) C element.

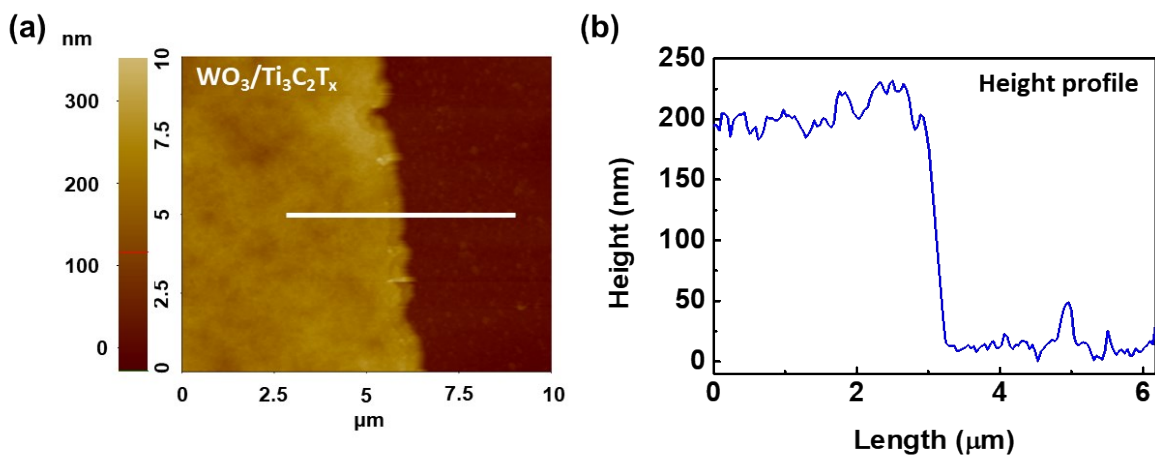

**Fig. S4** (a) AFM image of  $\text{WO}_3/\text{Ti}_3\text{C}_2\text{T}_x$  hybrids on ITO glass and (b) height profile of the identified line on the AFM image.

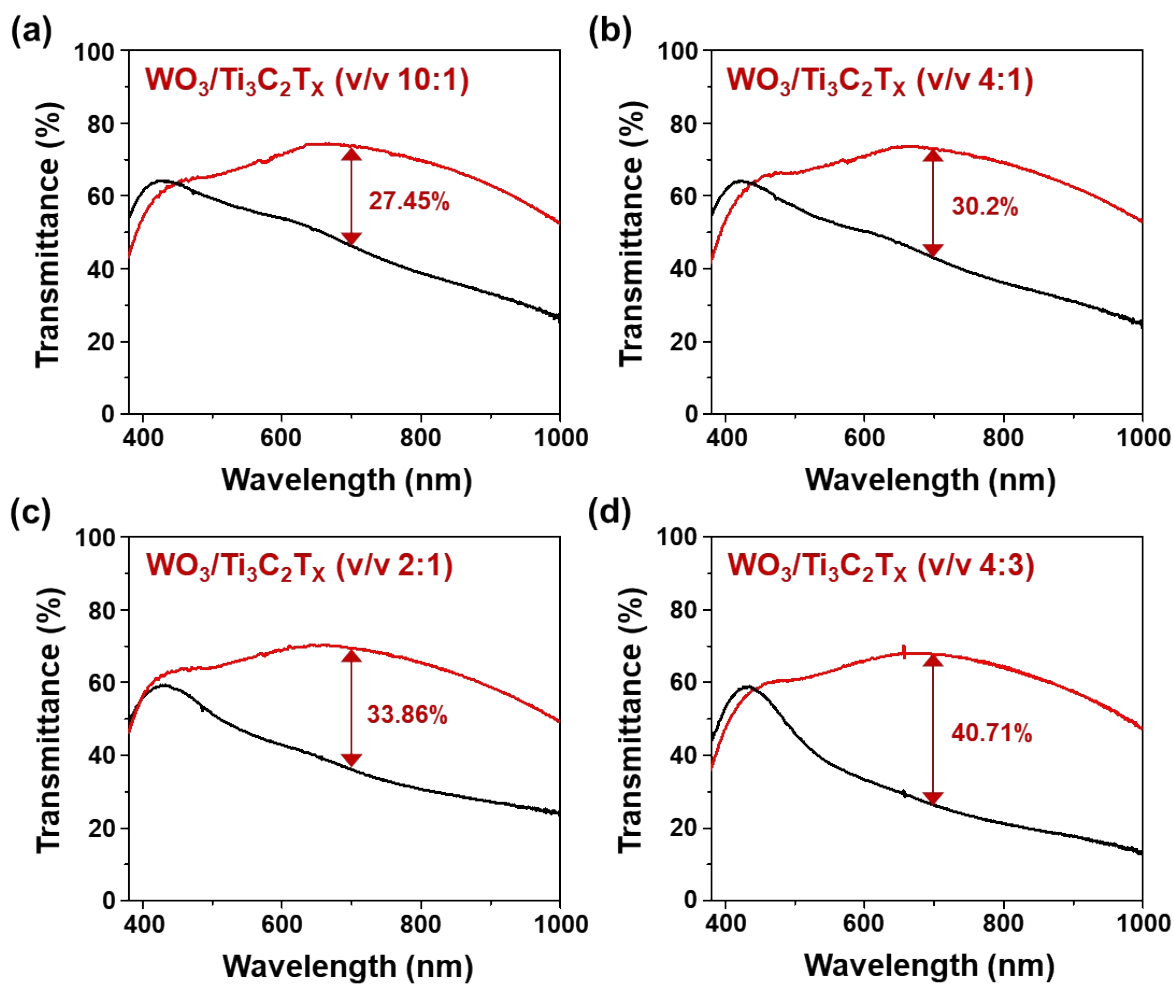

Fig. S5 Optical transmittance spectra of devices based on (a)  $\text{WO}_3/\text{Ti}_3\text{C}_2\text{T}_x$  (v/v 10:1), (b)  $\text{WO}_3/\text{Ti}_3\text{C}_2\text{T}_x$  (v/v 4:1), (c)  $\text{WO}_3/\text{Ti}_3\text{C}_2\text{T}_x$  (v/v 2:1), (d)  $\text{WO}_3/\text{Ti}_3\text{C}_2\text{T}_x$  (v/v 4:3).

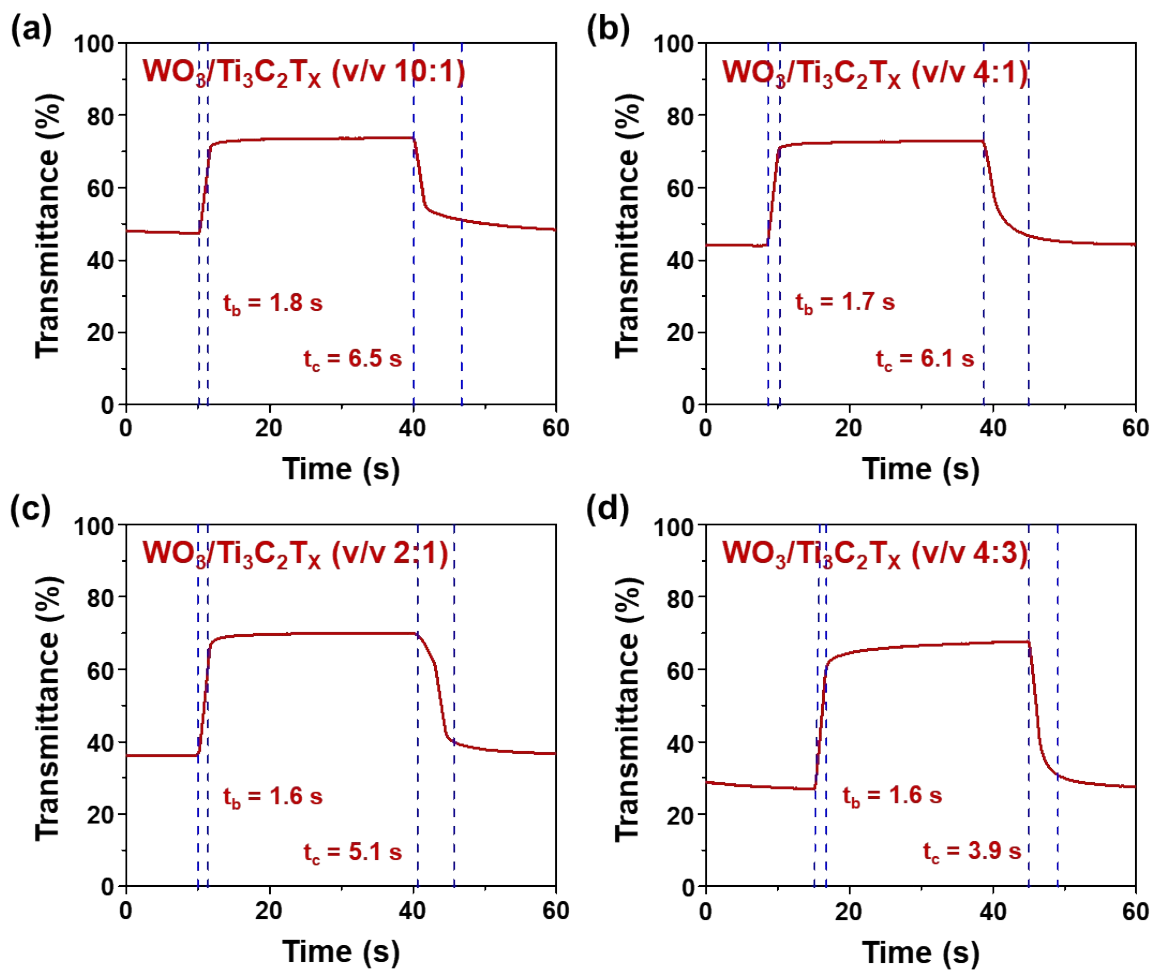

**Fig. S6** EC switching kinetics of devices based on (a)  $\text{WO}_3/\text{Ti}_3\text{C}_2\text{T}_x$  (v/v 10:1), (b)  $\text{WO}_3/\text{Ti}_3\text{C}_2\text{T}_x$  (v/v 4:1), (c)  $\text{WO}_3/\text{Ti}_3\text{C}_2\text{T}_x$  (v/v 2:1), (d)  $\text{WO}_3/\text{Ti}_3\text{C}_2\text{T}_x$  (v/v 4:3) at a wavelength of 700 nm.

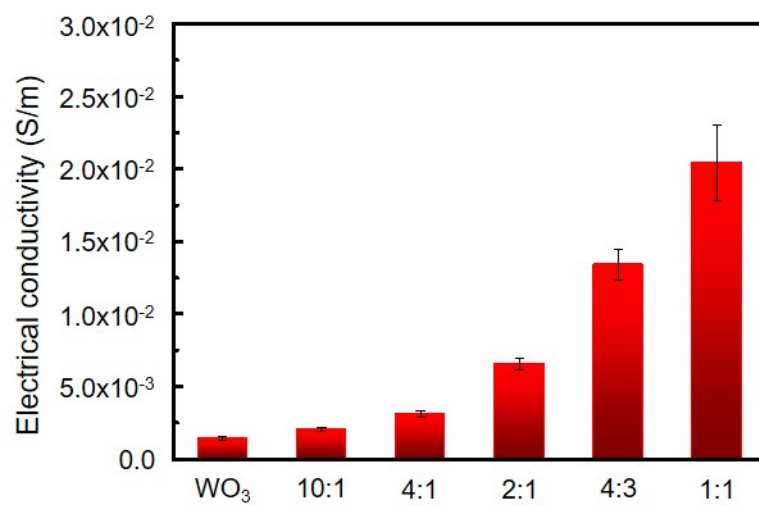

**Fig. S7** Electrical conductivity of  $\text{WO}_3$  and  $\text{WO}_3/\text{Ti}_3\text{C}_2\text{T}_x$  hybrids films with various v/v ratio.



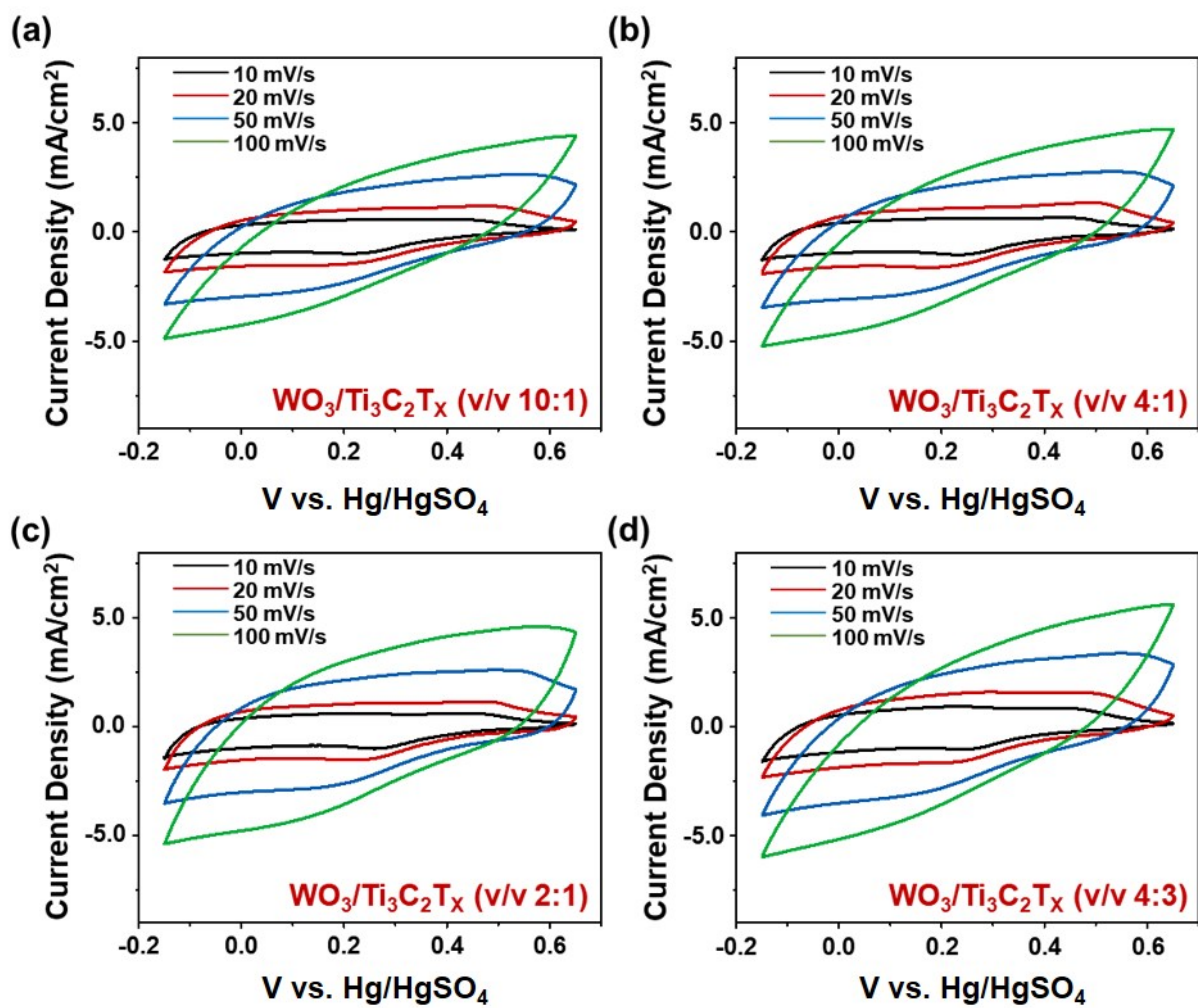

**Fig. S8** CV curves of (a) WO<sub>3</sub>/Ti<sub>3</sub>C<sub>2</sub>T<sub>x</sub> (v/v 10:1), (b) WO<sub>3</sub>/Ti<sub>3</sub>C<sub>2</sub>T<sub>x</sub> (v/v 4:1), (c) WO<sub>3</sub>/Ti<sub>3</sub>C<sub>2</sub>T<sub>x</sub> (v/v 2:1), (d) WO<sub>3</sub>/Ti<sub>3</sub>C<sub>2</sub>T<sub>x</sub> (v/v 4:3) with different scan rates.

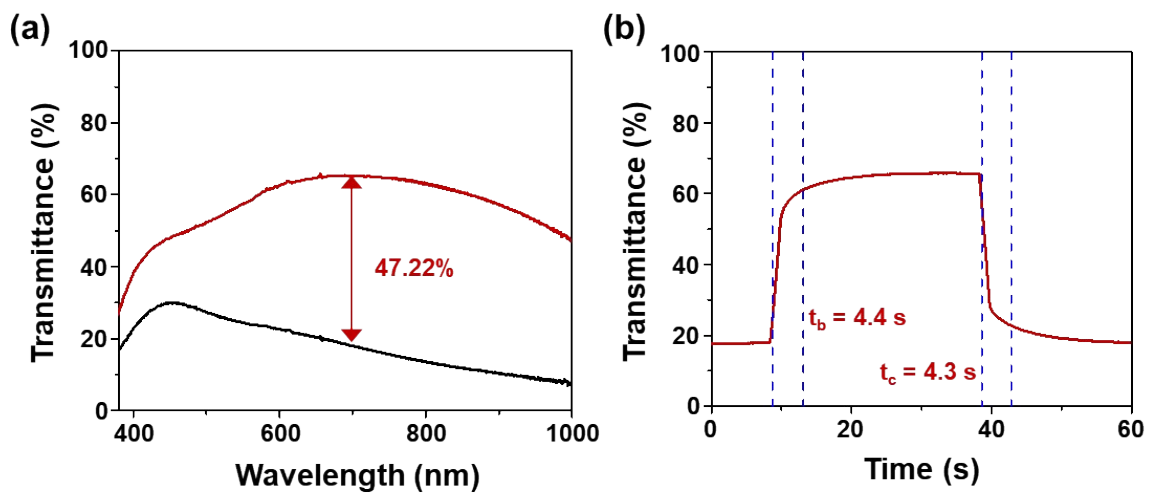

**Fig. S9** (a) Optical transmittance spectrum in bleaching and coloration, (b) EC switching kinetics of a flexible EC device (5 cm × 5 cm) based on  $\text{WO}_3/\text{Ti}_3\text{C}_2\text{T}_x$  hybrids.

## References

- 1 O. Bouvard, A. Krammer, A. Schöler, *Surf. Interface Anal.*, 2016, **48**, 660-663.
- 2 Y. Wang, Y. Li, Z. Qiu, X. Wu, P. Zhou, T. Zhou, J. Zhao, Z. Miao, J. Zhou, S. Zhuo, *J. Mater. Chem. A*, 2018, **6**, 11189-11197.
- 3 Q. Zhang, J. Teng, G. Zou, Q. Peng, Q. Du, T. Jiao, J. Xiang, *Nanoscale*, 2016, **8**, 7085-7093.
- 4 A. Ali, K. Hantanasirisakul, A. Abdala, P. Urbankowski, M.-Q. Zhao, B. Anasori, Y. Gogotsi, B. Aïssa, K.A. Mahmoud, *Langmuir*, 2018, **34**, 11325-11334.
- 5 C. Shen, L. Wang, A. Zhou, B. Wang, X. Wang, W. Lian, Q. Hu, G. Qin, X. Liu, *Nanomaterials*, 2018, **8**, 80.
- 6 Y. Cao, Q. Deng, Z. Liu, D. Shen, T. Wang, Q. Huang, S. Du, N. Jiang, C.-T. Lin, J. Yu, *RSC Adv.*, 2017, **7**, 20494-20501.
